CORRECTION

## Correction: Upregulation of DNA repair genes and cell extrusion underpin the remarkable radiation resistance of *Trichoplax adhaerens*

Angelo Fortunato, Alexis Fleming, Athena Aktipis, Carlo C. Maley

The last two authors, Athena Aktipis and Carlo C. Maley, should be noted as contributing equally to this work.

### Reference

1. Fortunato A, Fleming A, Aktipis A, Maley CC. Upregulation of DNA repair genes and cell extrusion underpin the remarkable radiation resistance of *Trichoplax adhaerens*. PLoS Biol. 2021;19(11): e3001471. <https://doi.org/10.1371/journal.pbio.3001471> PMID: [34788294](https://pubmed.ncbi.nlm.nih.gov/34788294/)

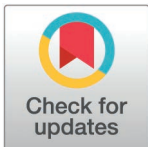

---

### OPEN ACCESS

**Citation:** Fortunato A, Fleming A, Aktipis A, Maley CC (2025) Correction: Upregulation of DNA repair genes and cell extrusion underpin the remarkable radiation resistance of *Trichoplax adhaerens*. PLoS Biol 23(4): e3003132. <https://doi.org/10.1371/journal.pbio.3003132>

**Published:** April 8, 2025

**Copyright:** © 2025 Fortunato et al. This is an open access article distributed under the terms of the [Creative Commons Attribution License](https://creativecommons.org/licenses/by/4.0/), which permits unrestricted use, distribution, and reproduction in any medium, provided the original author and source are credited.
